# Supplementary material for: Influence of social media comments on opinions about news
Source: Research Square preprint supplement (doi:10.21203/rs.3.rs-7876614/v1), 2025-11-11
Supplement: Supplementary file 1 [file fb2f6b38796af84f84600d8f.docx]

# Supplementary Methods

This file contains the stimuli used (in text form) in Section A, a description of the pilot experiments and task development in Section B, and references cited in sections A and B are listed in Section C.

# Stimuli

Below are the headlines and comments used in Studies 1 and 2.

## CLIMATE CHANGE

## Headline 1

**Scientists are seeing an ‘acceleration of pandemics’. They are looking at climate change.**Almost certainly, the impacts of pandemics like COVID-19 are exacerbated by climate change.

**(USA TODAY)**

<https://www.facebook.com/usatoday/posts/10158767766980667>

### Comments

#### Supportive

- Climate change also leads to more lack of rain, which leads to more famines, which leads to more people looking for alternative sources of protein such as bush meat and other off-menu meats. More wet markets means more lethal pandemics.
- Animals leaving or entering habitat can have drastic change on other species living there and on spread of a given virus. The outbreak of the Western Nile Virus about 20 years ago was caused by a change in avian wildlife.
- Thank you for offering Science for all to learn. Many will continue on their delusional denial, but scientific facts must be spread instead of misinformation
- I'd rather believe the scientists who have 8+ years of intense study in this area than all you people with your ridiculous opinions on climate change.

#### Opposing

- Humans are so ubiquitous on all parts of the planet that I don't believe that climate change can increase our exposure to novel pathogens. Our exposure level is saturated.
- Pretty sure it's because of all the air travel... like we have tons of travel between countries now and we didn't really before, of course pandemics are going to be more common.
- There is absolutely nothing happening different today that wasn’t happening centuries or even decades ago...The Al Gore Climate Change Business is only that... A BUSINESS with zero scientific evidence to support.
- Pandemics are a result of population growth and not from climate change. It is only an unproven hypothesis that climate change is human-caused, yet many take it as fact.

## Headline 2

**Climate change could be a ‘catastrophic’ national security threat.**

"Higher levels of warming will pose catastrophic, and likely irreversible, global security risks over the course of the 21st century,"the report states.

***(USA TODAY)***

<https://www.facebook.com/usatoday/posts/10158074847810667>

### Comments

#### Supportive

- - Could be? It's already a catastrophe. Every kind of natural weather event is more extreme than it should ever be.
  - Current anthropogenic climate change is most definitely not part of any cycle. The rate of atmospheric CO2 increment since the Industrial Revolution has never occurred.
  - 99% of scientists agree that fossil fuel burning is a major contribution to global warming. The other 1% are employed by fossil fuel companies. I'm not sure how you can deny it.
  - There is nothing to lose by making changes. Even if all scientists are wrong, at least we have made the planet a nice place to live in the process.

#### Opposing

- The world has been getting warmer for thousands of years, that's world history not science. Science is politics. World history is facts.
- The government is just trying scare you to get more of your money. It's all a lie. The earth goes through cycles of cooling and warming.
- 2010s, climate change, 2000s global heating, 1990s ozone layer, 1980s acid rain, 1970s, global cooling. If only there was a way that we could tax our way out of this?
  - Why according to the Vostok Ice Crystals the Earth was five degrees warmer during the Jurassic Era than today? According to reputable scientists, not the Environmental scientist Greta Turnberg.

## Headline 3

**Climate crisis hitting ‘worst case scenarios’, warns Environment Agency**

Extreme flooding in UK indicates urgent need for change if humanity is to survive

***(The Guardian)***

<https://www.facebook.com/theguardian/posts/10160012673736323>

### Comments

#### Supportive

- People won't understand the potential consequences until they're actually floating away clinging to the last bits of their destroyed house.
- Mass migration will become a pressing issue as many peoples in the world will eventually be on the move to escape uninhabitable and increasingly inhospitable areas.
- There seems to be no monetary incentive to change things long term - governments just don't work long term. Meanwhile the planet is submerged in disaster
- Flooding is everywhere. Weather warnings constant. We’ve lost 60% of our wildlife and plants in 50 years consistent with the rest of the world.

#### Opposing

- Good God! Another climate alarmist. The Human race is not going to die out because of a couple of degrees average temperature rise.
- There are mounds of scientific data that say global warming is a very low event scenario but those scientists don't seem to have as talented press agents.
- Lack of funding on flood defences due to political austerity is to blame not the overblown theory of man-made global warming.
- Another end of the world speech from some quasi-junk-science group with no accreditation to forecast the weather let alone predict the next apocalypse.

## VACCINATION

## Headline 1

**Insist or incentivize? Companies are deciding whether to make vaccines mandatory**

The vaccine question is vexing executives, who want to protect their workers and customers but avoid legal battles and accusations of discrimination against people who are not vaccinated

***(CNN)***

<https://www.facebook.com/cnn/posts/10161776325696509>

### Comments

#### Supportive

- They don't have to keep someone hired if they don't want to. If they want to make it a condition of employment, then it’s their right to do so.
- Many places of employment already require certain vaccinations along with schools and universities. It can be required by your private or government employer.
- Employers need to protect their employees and customers the best they can. If that means requiring vaccines, then they should do it.
- It's not discrimination. It's a condition of employment. If you don't want the vaccine, you are free to decline it and find a new job.

#### Opposing

- It's the people's right to decide what we get injected into our bodies. A company should not be able to dictate this. These are basic human rights.
- Then they need to pay damages for discrimination. Other people have the right to put their health first too you know.
- No, workers have rights too. Businesses should not be allowed to "do whatever they want". That's a major human rights violation.
- Why should my job require me to put something in my body that could have long term effects? Especially since they have no liability if it does. That is ludicrous.

## Headline 2

**A vaccine doesn’t mean that you can stop wearing a mask.**

Shipments of the Covid-19 vaccine are arriving across the United States. That doesn't mean, however, that Americans can stop wearing masks anytime soon.

***(CNN)***

<https://www.facebook.com/cnn/posts/10161558033991509>

### Comments

#### Supportive

- So anti-vaxers would still need to be protected by those of us that wear masks and take vaccines. I’ll do that for the good of my country, so businesses can stay open.
- Even vaccinated individuals may still spread the disease. So we need to wear masks until herd immunity is reached by the vaccine.
- The vaccine prevents one from the virus' symptoms but may not prevent one from spreading it to another who has not been vaccinated.
- Masks are IMPORTANT. I will be wearing a mask long after I get a vaccine. It’s become no big deal.

#### Opposing

- Because mask is a very big business, and it dosen’t work. The mask company need to make more money. The mask is a scam.
- So there is no reason to take the vaccine if you have to wear a silly mask, we're already doing that.
- We still have to wear masks and isolate? Ok, so I can do that without taking the vaccine. I rather know what exactly I'll be putting in my body.
- Having the vaccine means I am protected from the virus. So I will be one who will not wear masks after I have had the vaccine.

## Headline 3

**New Zealand fires nine border workers who refused Covid vaccine**

PM Jacinda Ardern had previously said workers who declined to be vaccinated would be moved to other roles

**(The Guardian)**

<https://www.facebook.com/theguardian/posts/10160202737466323>

### Comments

#### Opposing

- We should have autonomy over our own bodies. Nobody should lose their livelihood for refusing to put something in their bodies if it makes them uncomfortable.
- But there is no logic in this... vaccines don’t stop people from getting it or pass it on anymore or less than those that are unvaccinated
- If you agree with thjs don't complain if your own rights over your body are ever challenged, or you are sacked for something
- A line has been crossed if you can sack people for not having a medical intervention, and one whose trial isn't officially over till 2023.

#### Supportive

- If you're a frontline health worker, you need to be vaccinated. You can't be a chef and whine about your choice to not wash your hands. This is no different.
- Citizens are “enforced” to do many things as part of the benefit of living in a civilized society. Flu shots for hospital workers have been mandatory for years.
- When border control worker could infect and the infection might lead to death, you really wanna limit exposure with the means available (vaccine).
- Totally correct. I would fire them too. No-one in a democracy has the 'right' to risk infecting people with a deadly disease.

## VEGANISM

## Headline 1

**Is vegan diet healthy for kids? Belgian doctors say no**

Belgium's Royal Academy of Medicine recommended last week that children, teens, pregnant women, and nursing mothers do not follow a vegan diet.

***(CNN)***

<https://www.facebook.com/cnn/posts/10159509066946509>

### Comments

#### Supportive

- You dont need to be a genius to know that.. that would be child abuse if parents forced them..
- It makes sense what the doctors are saying, pregnant women need extra protein for a well developed baby. Children need meat protein to grow stronger muscles and healthy brain.
- Great! Eat a healthy balanced diet, that ought to include everything.. Except for some specific diet requirements for one's body type.
- There are a number of well documented studies that show that living 100% vegan isn’t healthy. By 100% vegan they mean no popping pills to increase your level of vitamins.

#### Opposing

- I suspect this has more to do with the very powerful Belgian cheese and dairy industry than anything else!
- This is simply false. I mean anyone can pick up a gallon of soymilk or almond milk and see that it has more calcium per serving than real cow milk.
- Whomever wrote this article really ought to do more research. Simply reading nutrition labels on many vegan and vegetarian products debunks this entirely.
- 100,000 accredited members of the Academy of Nutrition and Dietetics state that a vegan diet is suitable for all life stages and is often more healthful than a carnist diet.

## Headline 2

**Don’t go vegan to save the planet. You can help by being a better meat-eater.**

"If you’re uncomfortable with animal farming, but are unwilling to adopt the vegan lifestyle, you don’t need to stop eating meat, you just need to eat better meat."

***(USA TODAY)***

<https://www.facebook.com/usatoday/posts/10157489347310667>

### Comments

#### Supportive

- Agree 100%. Soy eaten by vegan is almost as bad.. a lot comes from South America and it requires land to be cleared.
- Healthier animals make healthier meat. So if you don’t pay attention to where you buy it from, you’re buying unhealthy meat. Buy local and grassfed!
- People have ate meat since the beginning of time. The difference is now the stuff (chemicals) that are put in our foods, meat etc
- I started doing this this year. I buy beef, pork, chicken, and eggs from a farm that practices sustainable pasture-raised animals (even the chickens) and humanely slaughters them.

#### Opposing

- It takes WAY MORE resources to grow plant food to feed animals and then kill the animals to eat them than just growing plant food we can survive on.
- It's completely irresponsible journalism to publish a piece so misleading and blatantly false with no factual evidence or science based research to support it.
- Anyone who has sincerely taken the time to seriously examine the ethical and environmental implications of animal agriculture is almost certainly vegan. There is no “happy exploitation”.
- You can raise more FOOD on the land it takes to raise just one COW or PIG. That cow and pig put more damage into our ENVIRONMENT on that land raising them.

## Headline 3

**Ethical veganism is a “philosophical belief”**

Ethical veganism is "philosophical belief" and therefore protected by law, UK employment tribunal rules.

***(BBC news)***

<https://www.facebook.com/bbcnews/posts/10157340529372217>

### Comments

#### Supportive

- Definition of philosophy: "a theory or attitude that acts as a guiding principle for behaviour". Ethical veganism absolutely fits that definition. I say this as a meat eater, too.
- I guess if you're going to have a philosophical belief, then not harming animals is a pretty good one.
- Love how triggered people get by a movement that wants to protect animals and the planet! Us Vegans are such monsters, aren’t we!
- It is not a necessity for humans to consume animal products, it's a choice. If you choose to harm animals, how is that not animal abuse?

#### Opposing

- I respect vegans and vegetarians, but this isn’t necessary. I was saying to my husband recently they almost behave like it’s a religion.
- Insane move by that judge, We need protection from those kind of oppressive people who feel that everyone should follow their lunatic ideas.
- aaaand that's why vegans are hated, not because of their lifestyle but because they try to impose it on everyone. Kind of like religion does.
- The moral reason behind veganism is worthy and I respect their choice but not enforce those beliefs on me. Validating beliefs in law is ridiculous.

# Task development

To implement our experiment, we first determined the most suitable social media platform. At the time of the task development in 2021, Facebook, YouTube and Instagram were the most popular platforms with respectively 71%, 74% and 38% Americans using them (<https://www.pewresearch.org/journalism/2019/10/02/americans-are-wary-of-the-role-social-media-sites-play-in-delivering-the-news/>). Importantly, Facebook was the leading platform to access news with 52% of Americans reading news on it, compared to 28% on YouTube and 17% on Twitter 1. We thus used the Facebook layout, as did other recent studies e.g., 2,3.

The following specific studies influenced the design of our study. Winter and colleagues’ 2015 study 4 reported that reading negative comments, in particular those of argumentative type, induced negative attitudes towards these posts, while supporting comments had no effect. It seems indeed that argumentative, civil comments have a strong effect in influencing other people’s perception and opinion about the news posts, probably signalling a higher expertise about the topic 5. However, Winter and colleagues’ study tested only one news post per participant in a between-subject design, which makes it more difficult to estimate the influenceability of a given individual. Colliander and colleagues’ 2019 study 2 tested the impact of several comments on several posts, but only employed unanimous comment sections, in contrast to real-world contexts which typically contain both critical and supportive comments. Wijenayake and colleagues’s 2021 study 3 tested how the trustworthiness of 14 real and 14 fake news Facebook posts was affected by 2-4 comments varying in their proportion of supportive and critical content. They found that participants tended to conform to the majority opinion, especially when this opinion was critical and when participants were unsure about their own opinion. Our experiment was inspired by this study.

To maximize ecological validity, we chose to use actual online news headlines posted on Facebook by well-known online newspapers. To create the stimuli, we searched for reputable online outlets that routinely posted news on Facebook and that had a broad audience. This would also ensure that these outlets would better represent what people encounter in their everyday life on social media. To collect online news, we chose well-known newspapers such as the New York Times, CNN, The Guardian, and Independent, among others. These online newspapers were selected because they received high trustworthiness scores from professional fact-checkers and are thought to have higher editorial standards than other untrustworthy hyperpartisan outlets 6.

After selecting online newspapers that regularly share news on Facebook, we had to decide which topics to use. These should have been well-known, debatable topics on which people may disagree, rather than extremely polarizing themes like politics and religion. Indeed, past research has shown that, when confronted with these extremely polarizing topics, individuals may be motivated to adjust their opinions differently than on other topics in other to maintain their identity and group affiliation 7. We opted to focus on three controversial contemporary issues: climate change, vaccination and veganism. These are very renowned topics that have sparked continuing global discussions in recent years and are relevant for current socioeconomic and environmental challenges. Therefore, news headlines about these themes were likely to elicit a variety of opinions from participants in the experiments. After determining which topics to employ, we searched the online Facebook pages of these newspapers for relevant news articles concerning the three selected issues. We aimed at finding news headlines that highlighted states of belief rather than factual events, as the first would make it easier to provoke thoughts and generate opinions about them. We gathered 9 suitable news headlines: 3 for climate change, 3 for vaccination, and 3 for veganism.

The next step was to collect real comments from Facebook users about these 9 news headlines. Since we picked large and popular online outlets, we were able to access a wide range of comments for each news headline, ranging from argumentative to subjective and from civil to uncivil. We chose to collect only argumentative, civil and very clear comments, as they have been demonstrated to be more persuasive for the users than subjective comments 4,8. The relevant, suitable comments were sorted into two categories: supporting and opposing the specific news headline. For each news headline, we collected 4 supporting and 4 opposing comments. We balanced the lengths of the supporting and opposing comments to ensure that they were regarded as equally compelling, since longer comments may be perceived as more argumentative and therefore more persuasive 9. However, in editing the length of the comments, we did not modify any text; instead, we ensured that supportive and opposing comments would have roughly similar length.

After gathering all the necessary comments for each of the 9 news headlines, we created fake Facebook posts using an online Facebook post generator (<https://generatestatus.com/fake-facebook-post-generator/>) that provides the standard Facebook post layout, while allowing the customization of the image, text and comments to the post. This tool allowed us to control and create stimuli that were consistently similar to one another, reducing the need for extensive editing to remove user reactions or other users’ responses to the selected comments. Each stimulus had the layout of a snack news, such as a picture, the news headline (below the picture), and a brief description of the article written by the online newspaper (above the article). Moreover, for each of the 9 news headlines, we crafted multiple comment sections with 4 comments below the post as the main experimental manipulation (see **Fig. 1** for an example of the stimuli created).

After creating the Facebook posts, to control for possible confounding effects, we proceed to hide any information that was not relevant for our study. We covered the name and logo of the online newspaper, as well as the name and picture of each Facebook user who commented on that post, to avoid source credibility bias 10,11 and gender and race biases 12. Moreover, we removed the numbers of likes and shares for each post, as previous studies showed mixed evidence about the effect that likes have on how people perceive online posts. For instance, some studies found that posts with more likes were judged to be more reflective of the public opinion and could more easily trigger the “Bandwagon Effect” 13–15. Other studies, instead, found that likes were not perceived as a clear representation of the public climate, because the interpretation of the number of likes is subjective and context-dependent 16,17. In total, for each of the 9 news headlines, we developed 4 different versions: one with 4 supportive comments (for the “supportive condition”), one with 4 opposing comments (for the “opposing condition”), and two different versions with 2 supportive and 2 opposing comments (“mixed condition”).

## Pilot Study I: Assessing the Valence of Comments

In order to validate the valence of the comments in reflecting the intended manipulation, we conducted a first pilot study where participants rated the valence of the stimuli we collected. The pilot study was implemented using the platform Qualtrics (Qualtrics, Provo, UT) and participants were recruited through the platform Amazon MTurk in May 2021. MTurk is a popular crowdfunding platform that has been highly involved recently in scientific data collection due to its speed and accessibility. However, there are some potential issues with its use that we attempted to address by implementing different measures. For example, due to the anonymous nature of the platform, it may be more challenging (compared to lab settings) to ensure that participants complete tasks accurately. To address these possible concerns and increase the validity and reliability of our data, we used several quality control measures, such as attention checks and exclusion criteria. Moreover, we restricted participation to MTurk workers from the United States who had completed at least 1000 tasks successfully on the platform and had a minimum 98% approval rating. A total of 41 participants were recruited, with 4 being subsequently excluded based on predefined exclusion criteria (final sample: *N* = 37, 13 female, *Mage* = 34.5, *SDage* = 12.9). The exclusion criteria included going through the survey at an unreasonable pace and rating the comments’ valence inconsistently with the actual sentiment of the comment (for example, rating as “opposing” a comment that supported the news headline).

At the beginning of the task, participants were presented with a news headline accompanied by 4 comments. They were instructed to rate the valence of the 4 comments with a scale from -7 to +7, where -7 indicated that the 4 comments were considered strongly opposing to the content of the news headline, while +7 signified strong support. A rating of 0 indicated that the 4 comments were evenly balanced between supportive and critical towards the news headline (for example, with two opposing and two supportive comments). The pilot study lasted 15 minutes and participants were compensated 3$ and the possibility of an extra dollar for good performance. Good performance was defined as, for example, rating as positive a supportive comment and rating as negative an opposing comment, demonstrating that participants really read the content of the comments presented. Results from Pilot I confirmed that participants were able to distinguish the valence of the provided comments. Supportive comments received positive ratings (*M* = 4.6; *SD* = 3.2), opposing comments received negative ratings (*M* = -5.2; *SD* = 2.5), and mixed comments fell in between (*M* = -0.4; *SD* = 2.4).

## Pilot Study II: Choosing the Task Design

Following stimuli validation, we conducted another pilot study to assess what study design would be best suited to use. The goal of the final behavioural task was to measure the impact of other people’s opinions expressed in the comments on one’s own opinion formation and adjustment. We developed two distinct study designs to compare and contrast, since each had its own set of advantages and disadvantages. We called them *Sequential Design* and *Block Design*. On one hand, in the *Sequential Design*, participants would first rate their opinion to a single news item without the comments, immediately followed by a rating on the same news headline with comments. On the other hand, in the *Block Design*, participants would rate their opinions on all of the gathered news headlines without comments (“news headlines block”) before moving on to the block that displayed all of the news headlines now paired with the comments (“comments block”). One advantage of the Sequential Design is its ecological validity, since individuals in real life view one news headline and then instantly the comment section of that same news item. Because there is more time between the first and second opinion ratings, the Block Design, on the other hand, has the advantage of reducing the *anchoring effect* 18 which occurs when participants tend to anchor their second opinion rating to their first one, as well as the *need for consistency* 19 which is the tendency to behave consistently and be resistant to change. However, one disadvantage of the Block Design is that it not only has lower ecological validity, but it also adds a lot of information between the first and second opinion ratings (such as all the other news headlines). This would make it difficult to discern the effect of the comments from that of the other news headlines. Therefore, the second pilot study was conducted to assess which of the two designs would lead to stronger behavioural effects.

On the platform MTurk, 27 participants from the United States (9 female, *Mage* = 38.5, *SDage* = 12.9) were recruited for the Sequential Design and 26 participants (7 female, *Mage* = 39.8, *SDage* = 14) for the Block Design. Two participants were removed from the analyses of the Sequential Design and one from the Block Design due to the exclusion criteria (same as in Pilot I). The Sequential Design demonstrated superiority in inducing social influence both after supportive comments (*V* = 561.5, *p* = 0.001) and after opposing comments (*V* = 103.5, *p* = 0.01), as opposed to only after supportive comments in the Block Design (*V* = 19, *p* = 0.02). Consequently, the Sequential Design was selected due to its greater ecological validity and its ability to elicit a stronger behavioural effect.

# Supplementary References

1. Pearson, G. Sources on social media: Information context collapse and volume of content as predictors of source blindness. *New Media Soc.* **23**, 1181–1199 (2021).

2. Colliander, J. “This is fake news”: Investigating the role of conformity to other users’ views when commenting on and spreading disinformation in social media. *Comput. Hum. Behav.* **97**, 202–215 (2019).

3. Wijenayake, S., Hettiachchi, D., Hosio, S., Kostakos, V. & Goncalves, J. Effect of Conformity on Perceived Trustworthiness of News in Social Media. *IEEE Internet Comput.* **25**, 12–19 (2021).

4. Winter, S., Brückner, C. & Krämer, N. C. They came, they liked, they commented: Social influence on Facebook news channels. *Cyberpsychology Behav. Soc. Netw.* **18**, 431–436 (2015).

5. Williams, S. & Hsieh, G. The Effects of User Comments on Science News Engagement. *Proc. ACM Hum.-Comput. Interact.* **5**, 1–29 (2021).

6. Pennycook, G. *et al.* Shifting attention to accuracy can reduce misinformation online. *Nature* **592**, 590–595 (2021).

7. Anglin, S. M. Do beliefs yield to evidence? Examining belief perseverance vs. change in response to congruent empirical findings. *J. Exp. Soc. Psychol.* **82**, 176–199 (2019).

8. Prochazka, F., Weber, P. & Schweiger, W. Effects of Civility and Reasoning in User Comments on Perceived Journalistic Quality. *Journal. Stud.* **19**, 62–78 (2018).

9. Wood, W., Kallgren, C. A. & Preisler, R. M. Access to attitude-relevant information in memory as a determinant of persuasion: The role of message attributes. *J. Exp. Soc. Psychol.* **21**, 73–85 (1985).

10. Hohenberg, B. C. von & Guess, A. M. When Do Sources Persuade? The Effect of Source Credibility on Opinion Change. *J. Exp. Polit. Sci.* **10**, 328–342 (2023).

11. Nadarevic, L., Reber, R., Helmecke, A. J. & Köse, D. Perceived truth of statements and simulated social media postings: an experimental investigation of source credibility, repeated exposure, and presentation format. *Cogn. Res. Princ. Implic.* **5**, 56 (2020).

12. Hawkins, I., Roden, J., Attal, M. & Aqel, H. Race and gender intertwined: why intersecting identities matter for perceptions of incivility and content moderation on social media. *J. Commun.* **73**, 539–551 (2023).

13. Kim, J. W. They liked and shared: Effects of social media virality metrics on perceptions of message influence and behavioral intentions. *Comput. Hum. Behav.* **84**, 153–161 (2018).

14. Lee, H. & Oh, H. J. Normative Mechanism of Rumor Dissemination on Twitter. *Cyberpsychology Behav. Soc. Netw.* **20**, 164–171 (2017).

15. Xu, Q. Social Recommendation, Source Credibility, and Recency: Effects of News Cues in a Social Bookmarking Website. *Journal. Mass Commun. Q.* **90**, 757–775 (2013).

16. Lee, E.-J. & Jang, Y. J. What Do Others’ Reactions to News on Internet Portal Sites Tell Us? Effects of Presentation Format and Readers’ Need for Cognition on Reality Perception. *Commun. Res.* **37**, 825–846 (2010).

17. Neubaum, G. & Krämer, N. C. Monitoring the Opinion of the Crowd: Psychological Mechanisms Underlying Public Opinion Perceptions on Social Media. *Media Psychol.* **20**, 502–531 (2017).

18. Tversky, A. & Kahneman, D. Judgment under Uncertainty: Heuristics and Biases: Biases in judgments reveal some heuristics of thinking under uncertainty. *Science* **185**, 1124–1131 (1974).

19. Festinger, L. *A Theory of Cognitive Dissonance*. xi, 291 (Stanford University Press, 1957).
